# Supplementary material for: Opiate Prescriptions Vary among Common Urologic Procedures: A Claims Dataset Analysis
Source: MDPI journal article supplement (doi:10.3390/jcm11051329), 2022-02-28
Supplement: s1 [file s1]

**Supplemental Table S1.** CPT codes for procedures analyzed in this study.

| Procedure                                                | CPT Code | Type of Surgical Procedure |
|----------------------------------------------------------|----------|----------------------------|
| Posterior urethroplasty                                  | 53415    | Reconstructive             |
| Anterior urethroplasty                                   | 53410    | Reconstructive             |
| First stage urethroplasty                                | 53400    | Reconstructive             |
| Second stage urethroplasty                               | 53405    | Reconstructive             |
| First stage hypospadias                                  | 54304    | Reconstructive             |
| Second stage hypospadias < 3 cm                          | 54308    | Reconstructive             |
| Hypospadias cripple                                      | 54352    | Reconstructive             |
| Urethrectomy (male)                                      | 53215    | Reconstructive             |
| Closure of urethrocutaneous fistula                      | 53520    | Reconstructive             |
| Rectourethral fistula repair                             | 45820    | Reconstructive             |
| Perineal prostatectomy, subtotal                         | 55801    | Major oncologic—pelvic     |
| Tunica vaginalis flap/adjacent tissue transfer (<10 cm)  | 14040    | Reconstructive             |
| Buccal mucosa harvest (full thickness graft)             | 15240    | Reconstructive             |
| Cystoscopy, clot evacuation                              | 52001    | Transurethral bladder      |
| Transurethral resection of prostate                      | 52601    | Transurethral bladder      |
| Transurethral resection regrowth                         | 52630    | Transurethral bladder      |
| UroLift                                                  | 52441    | Transurethral bladder      |
| Additional UroLift                                       | 52442    | Transurethral bladder      |
| High power potassium-titanyl phosphate laser of prostate | 52647    | Transurethral bladder      |
| Holmium laser enucleation of prostate                    | 52649    | Transurethral bladder      |
| Transurethral incisions of bladder neck contracture      | 52640    | Transurethral bladder      |
| Prostate needle biopsy                                   | 55700    | Transurethral bladder      |
| Transrectal ultrasound guidance                          | 76942    | Transurethral bladder      |
| Cystolitholopaxy (<2.5 cm)                               | 52317    | Transurethral bladder      |
| Cystolitholopaxy (>2.5 cm)                               | 52318    | Transurethral bladder      |
| Ureteroscopy with stone extraction                       | 52352    | Stone                      |
| Ureteroscopy with laser lithotripsy (no stent)           | 52353    | Stone                      |
| Ureteroscopy with laser lithotripsy (with stent)         | 52356    | Stone                      |
| Percutaneous nephrolithotomy < 2 cm                      | 50080    | Stone                      |
| Percutaneous nephrolithotomy > 2 cm                      | 50081    | Stone                      |
| Renal endoscopy with stone removal                       | 50561    | Stone                      |
| Shockwave lithotripsy                                    | 50590    | Stone                      |
| Cystoscopy with biopsy                                   | 52204    | Transurethral bladder      |

|                                                                                                     |          |                        |
|-----------------------------------------------------------------------------------------------------|----------|------------------------|
| Cystoscopy with urethral dilation                                                                   | 52281    | Transurethral bladder  |
| Direct vision internal urethrotomy                                                                  | 52276    | Transurethral bladder  |
| Cystoscopy, external sphincterotomy                                                                 | 52277    | Transurethral bladder  |
| Transurethral resection of bladder tumor < 0.5 cm                                                   | 52214    | Transurethral bladder  |
| Transurethral resection of bladder tumor 0.5–2.0 cm                                                 | 52234    | Transurethral bladder  |
| Transurethral resection of bladder tumor 2.0–5.0 cm                                                 | 52235    | Transurethral bladder  |
| Transurethral resection of bladder tumor > 5 cm                                                     | 52240    | Transurethral bladder  |
| Cystoscopy and stent removal (simple)                                                               | 52310    | Transurethral bladder  |
| Cystoscopy and stent removal (complex)                                                              | 52315    | Transurethral bladder  |
| Cystoscopy with ureteral catheterization                                                            | 52005    | Transurethral bladder  |
| Cystoscopy with ureteral stent placement                                                            | 52332    | Transurethral bladder  |
| Ureteroscopy, diagnostic                                                                            | 52351    | Stone                  |
| Ureteroscopy treat ureteropelvic junction stricture                                                 | 52345    | Stone                  |
| Ureteroscopy treat ureteral stricture                                                               | 52344    | Stone                  |
| Ureteroscopy with biopsy                                                                            | 52354    | Stone                  |
| Ureteroscopy with resection of tumor                                                                | 52355    | Stone                  |
| Renal endoscopy, diagnostic                                                                         | 50551    | Stone                  |
| Renal endoscopy with biopsy/fulguration/resection                                                   | 50576    | Stone                  |
| Percutaneous access for nephroscopy if no tube left                                                 | 50395    | Stone                  |
| Placement of percutaneous nephrostomy set after nephroscopy (including initial percutaneous access) | 50432    | Stone                  |
| Placement of nephroureteral stent after nephroscopy (including initial perc access)                 | 50433    | Stone                  |
| Convert percutaneous nephrostomy set to nephroureteral stent                                        | 50434    | Stone                  |
| Exchange percutaneous nephrostomy set (not initial)                                                 | 50435    | Stone                  |
| Place antegrade stent after nephroscopy (not initial)                                               | 50693    | Stone                  |
| Place only antegrade stent after nephroscopy (not initial)                                          | 50694    | Stone                  |
| Place antegrade stent, with separate percutaneous nephrostomy set (not initial access)              | 50695    | Stone                  |
| Partial cystectomy (simple)                                                                         | 51550    | Major oncologic—pelvic |
| Cystectomy                                                                                          | 51570    | Major oncologic—pelvic |
| Cystectomy ileal conduit                                                                            | 51590    | Major oncologic—pelvic |
| Cystectomy ileal conduit and pelvic lymph node dissection                                           | 51595    | Major oncologic—pelvic |
| Cystectomy neobladder                                                                               | 51596    | Major oncologic—pelvic |
| Ureterotomy stent                                                                                   | 50605-50 | Major oncologic—kidney |

|                                                                   |          |                        |
|-------------------------------------------------------------------|----------|------------------------|
| Ileal conduit                                                     | 50820-50 | Major oncologic—pelvic |
| Neobladder                                                        | 50825    | Major oncologic—pelvic |
| Pelvic lymph node dissection                                      | 38770    | Major oncologic—pelvic |
| Radical retropubic prostatectomy                                  | 55840    | Major oncologic—pelvic |
| Radical retropubic prostatectomy and pelvic lymph node dissection | 55845    | Major oncologic—pelvic |
| Open nephrectomy (includes nodes and inferior vena cava thrombus) | 50230    | Major oncologic—pelvic |
| Open partial nephrectomy                                          | 50240    | Major oncologic—pelvic |
| Retroperitoneal lymph node dissection                             | 38780    | Major oncologic—pelvic |
| Simple retropubic prostatectomy                                   | 55831    | Major oncologic—pelvic |
| Simple suprapubic prostatectomy                                   | 55821    | Major oncologic—pelvic |
| Revision of urostomy (to skin)                                    | 50727    | Reconstructive         |
| Ureteroplasty                                                     | 50700    | Reconstructive         |
| Ureteroneocystostomy (single)                                     | 50780    | Reconstructive         |
| Ureteroneocystostomy with hitch or flap                           | 50785    | Reconstructive         |
| Partial cystectomy and ureteral reimplant                         | 51565    | Reconstructive         |
| Ureterolysis for retroperitoneal fibrosis                         | 50715    | Reconstructive         |
| Ureteroureterostomy                                               | 50760    | Reconstructive         |
| Ureterocalycostomy                                                | 50750    | Reconstructive         |
| Ureteroenterostomy                                                | 50800    | Reconstructive         |
| Ileal ureter                                                      | 50840    | Reconstructive         |
| Excision of penile plaque with graft up to 5 cm                   | 54111    | Reconstructive         |
| Laparoscopic/robotic cyst decortication                           | 50541    | Major oncologic—kidney |
| Laparoscopic/robotic renal cryoablation                           | 50542    | Major oncologic—kidney |
| Laparoscopic/robotic simple nephrectomy                           | 50546    | Major oncologic—kidney |
| Laparoscopic/robotic radical nephrectomy                          | 50545    | Major oncologic—kidney |
| Laparoscopic/robotic nephroureterectomy                           | 50548    | Major oncologic—kidney |
| Laparoscopic/robotic partial nephrectomy                          | 50543    | Major oncologic—kidney |
| Laparoscopic/robotic radical prostatectomy                        | 55866    | Major oncologic—kidney |
| Laparoscopic/robotic lymph node dissection                        | 38571    | Major oncologic—pelvic |
| Laparoscopic/robotic pyeloplasty                                  | 50544    | Reconstructive         |
| Laparoscopic/robotic adrenalectomy                                | 60650    | Major oncologic—kidney |
| Prosthetics                                                       |          | Prosthetic             |
| Inflatable penile prosthesis                                      | 54405    | Prosthetic             |

|                                                 |       |                  |
|-------------------------------------------------|-------|------------------|
| Artificial urinary sphincter                    | 53445 | Prosthetic       |
| Malleable penile prosthesis                     | 54400 | Prosthetic       |
| Inflatable penile prosthesis revision           | 54408 | Prosthetic       |
| Remove/replace inflatable penile prosthesis     | 54410 | Prosthetic       |
| Female sling for incontinence                   | 57288 | Prosthetic       |
| Male sling for incontinence                     | 53440 | Prosthetic       |
| Artificial urinary sphincter revision/removal   | 53447 | Prosthetic       |
| Penectomy                                       | 54125 | Inguinal/scrotal |
| Partial penectomy                               | 54120 | Inguinal/scrotal |
| Spermatoclectomy                                | 54840 | Inguinal/scrotal |
| Hydrocelectomy (unilateral)                     | 55040 | Inguinal/scrotal |
| Hydrocelectomy (bilateral)                      | 55041 | Inguinal/scrotal |
| Hydrocele repair bottle type                    | 55060 | Inguinal/scrotal |
| Varicocelectomy                                 | 55530 | Inguinal/scrotal |
| Vasovasostomy                                   | 55400 | Inguinal/scrotal |
| Vasopididymostomy (unilateral)                  | 54900 | Inguinal/scrotal |
| Biopsy of testis, incisional                    | 54505 | Inguinal/scrotal |
| Scrotal orchiectomy                             | 54520 | Inguinal/scrotal |
| Inguinal (radical) orchiectomy                  | 54530 | Inguinal/scrotal |
| Reduction in torsion and contralateral fixation | 54600 | Inguinal/scrotal |
| Excision appendix testis                        | 54830 | Inguinal/scrotal |
| Excision of spermatic cord lesion               | 55520 | Inguinal/scrotal |
| Circumcision                                    | 54161 | Inguinal/scrotal |

**Supplemental Table S2.** List of opioid and opioid-like medications analyzed in this study.

|                                  |                                |
|----------------------------------|--------------------------------|
| <b>Opioid only</b>               | Morphine                       |
|                                  | Hydromorphone                  |
|                                  | Fentanyl                       |
|                                  | Methadone                      |
|                                  | Codeine                        |
|                                  | Hydrocodone                    |
|                                  | Buprenorphine                  |
|                                  | Piritramide                    |
|                                  | Meperidine                     |
|                                  | Pentazocine                    |
|                                  | Butorphanol                    |
|                                  | Oxymorphone                    |
|                                  | Nalbuphine                     |
|                                  | Oxycodone                      |
| <b>Opioid with acetaminophen</b> | Hydrocodone with acetaminophen |
|                                  | Oxycodone with acetaminophen   |
|                                  | Codeine with acetaminophen     |
| <b>Opioid-like</b>               | Tramadol                       |
|                                  | Tapentadol                     |
